# Supplementary material
Source: PubMed Central journal article supplement (PMC4854652)
Supplement: NIHMS781991-supplement-Supp_Figs___Tables.pdf [file NIHMS781991-supplement-Supp_Figs___Tables.pdf]

# Supplementary Figure 1

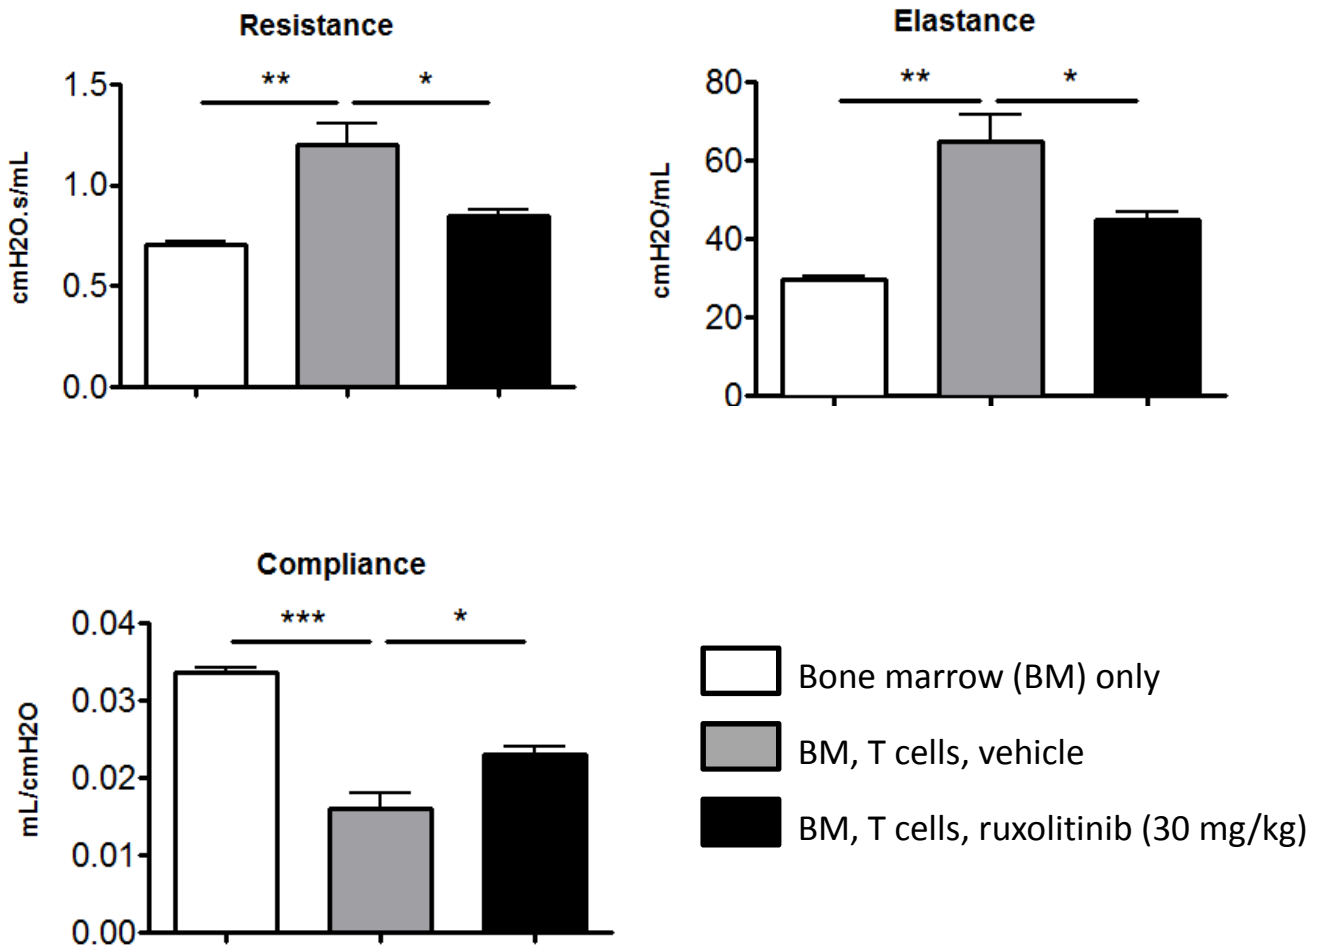

## Supplementary Figure 2

BM only

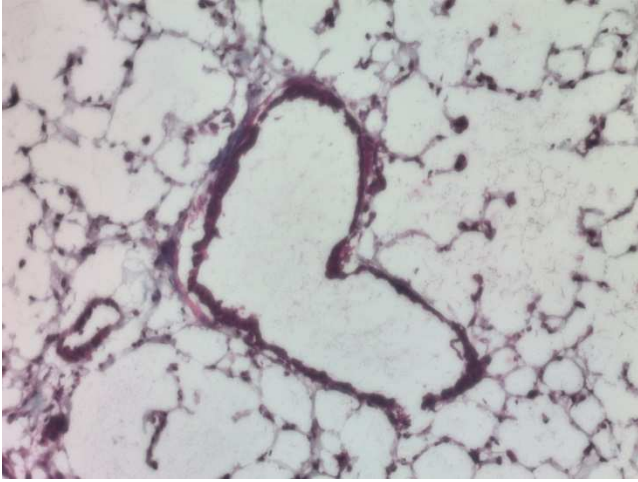

BM + T cells + vehicle

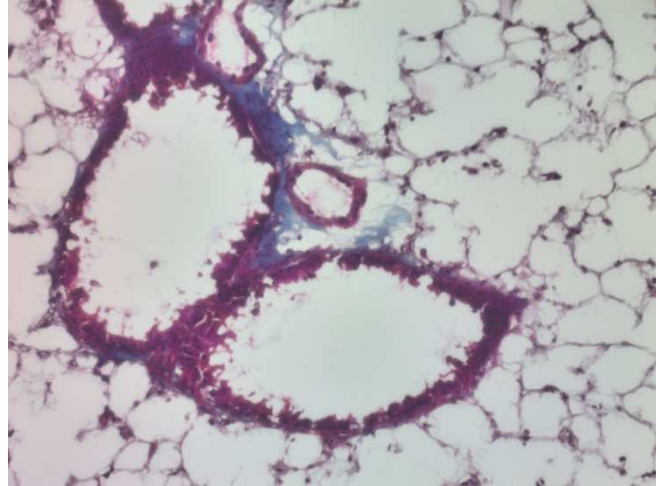

BM + T cells + ruxolitinib

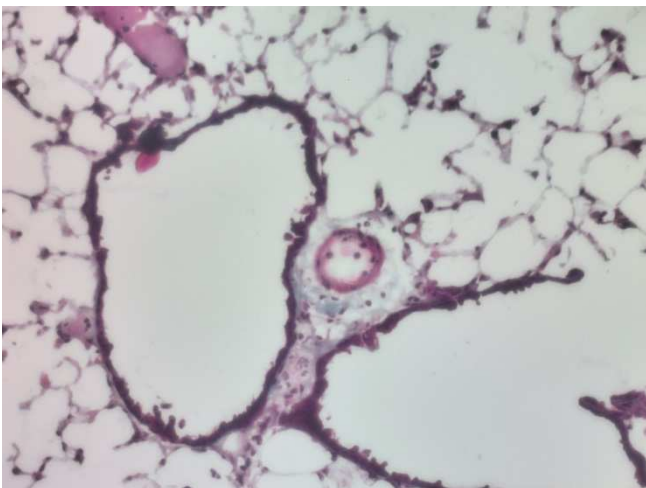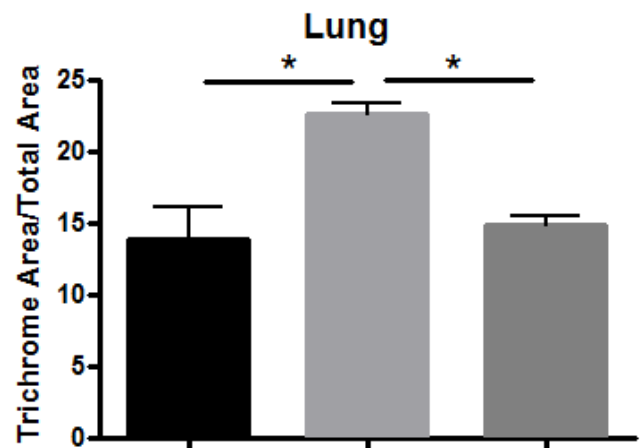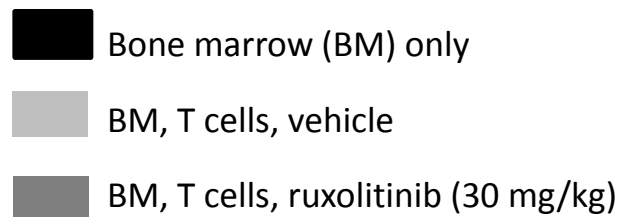

## **Supplementary material and Figure legends**

### **Suppl. Figure 1:**

C57B/6 T-cell-depleted bone marrow with (BM+T) or without (BM Only) 85,000 purified C57B/6 T cells was injected to conditioned B10.BR recipient mice. From day 28-56, cGVHD mice were treated with 30mg/kg Ruxolitinib or vehicle. Day 60 pulmonary function test was taken on anesthetized animals. Animals (n=6) were artificially ventilated. Resistance, Elastance and Compliance were measured as indicators of pulmonary function.

### **Suppl. Figure 2:**

Histological analysis of the lungs of mice treated as described for Suppl. Figure 1 is shown. The trichrome positive area represents collagen deposition as a stigmata of chronic pulmonary GVHD. Representative images from the 3 groups and a quantification of the trichrome positive area are shown.

**Supplementary Table 1: Acute GvHD group - Transplant characteristics**

| Donor   | Chemotherapy conditioning | IS as prophylaxis         | IS initiated as GvHD treatment prior to Ruxolitinib (duration in weeks)                                 |
|---------|---------------------------|---------------------------|---------------------------------------------------------------------------------------------------------|
| MUD     | TBI (12Gy)<br>etoposide   | CYA , MTX                 | - steroids (4)<br>- CYA (3)<br>- Eve (2)<br>- ECP (3)                                                   |
| MUD     | FLu/TT                    | CYA, alemtuzumab          | - steroids (18)<br>- MMF (4)<br>- CYA (4)<br>- Eve (9)<br>- ECP (11)                                    |
| MUD     | FBM                       | CYA, alemtuzumab          | - steroids (31)<br>- UVB radiation (5)<br>- MMF (4)<br>- MTX (2)<br>- CYA (7)<br>- Eve (5)<br>- ECP (9) |
| MUD     | FBM                       | CYA<br>alemtuzumab        | - steroids (29)<br>- Eve (8)<br>- CYA (13)<br>- ECP (7)                                                 |
| MUD     | FBM                       | CYA<br>alemtuzumab        | - CYA<br>- Eve (6)<br>- ECP (4)                                                                         |
| MMUD    | FBM                       | CYA<br>alemtuzumab        | - steroids (80)<br>- CYA (80)<br>- MTX (20)                                                             |
| MUD     | FBM                       | CYA<br>alemtuzumab        | - steroids (3)<br>- ECP (1)                                                                             |
| sibling | Flu/TT                    | CYA<br>MTX                | - steroids (52)<br>- CYA<br>- Eve (52)<br>- ECP (1)                                                     |
| MMUD    | FBM                       | CYA<br>alemtuzumab        | - steroids (200)<br>- CYA<br>- Eve                                                                      |
| MUD     | TBF                       | CYA<br>MMF<br>ATG         | - steroids (28)<br>- CYA (24)<br>- ECP (2)                                                              |
| MMUD    | TBI<br>etoposide          | CYA<br>MMF<br>ATG         | - steroids (6)<br>- CYA (4)<br>- MMF (4)<br>- ATG (4)                                                   |
| MMUD    | TBF                       | MMF<br>CYA<br>ATG         | - steroids (11)<br>- CYA (11)<br>- Eve (11)<br>- ECP (2)                                                |
| MUD     | FBM                       | CYA<br>MMF<br>ATG         | - steroids (4)<br>- CYA (4)<br>- Eve (5)                                                                |
| sibling | Flu/Bu                    | MMF<br>CYA                | - steroids (12)<br>- CYA (4)<br>- Tac (5)                                                               |
| MUD     | FLu/TT                    | CYA<br>MMF<br>ATG         | - steroids (3)                                                                                          |
| MMUD    | FBM                       | CYA<br>MMF<br>alemtuzumab | - steroids (28)<br>- ECP (8)                                                                            |
| MUD     | FLu/TT                    | CYA , MMF, ATG            | - steroids (3)<br>- MMF (3)                                                                             |

|                                |                                  |                         |                                                                                                   |
|--------------------------------|----------------------------------|-------------------------|---------------------------------------------------------------------------------------------------|
|                                |                                  |                         | - CYA (5)                                                                                         |
| sibling                        | Bu/Cy                            | CYA , MTX               | - CYA<br>- MMF<br>- steroids<br>- ECP (6)<br>- rituximab (1)                                      |
| MMUD                           | FLu / TT /<br>Busulfan           | ATG/CYA /<br>MMF        | - CYA (ca 24)<br>- steroids (ca 24)<br>- ATG 2x<br>- MMF                                          |
| MMUD                           | FLu / TT /<br>Busulfan           | ATG/CYA /<br>MMF        | - CYA (6)<br>- steroids (4)                                                                       |
| MUD                            | FLu / TT /<br>Busulfan           | ATG/CYA /<br>MMF        | - CYA (2)<br>- steroids (3)                                                                       |
| sibling                        | FBM                              | CYA /MMF                | - CYA (4)<br>- MMF (4)<br>- steroids (3)                                                          |
| MMUD                           | FBM                              | CYA /MMF/ATG            | - CYA (5)<br>- steroids (4)                                                                       |
| MUD                            | FBM                              | CYA<br>/MMF/alemtuzumab | - CYA (7)<br>- Eve (4)<br>- steroids (8)<br>- ECP (4)                                             |
| sibling                        | TBF                              | CYA /MMF                | - CYA (5)<br>- steroids (7)                                                                       |
| sibling                        | Flu Mel                          | ATG/CYA /MTX            | - steroids (6)<br>- Tac (4)<br>- alemtuzumab 1x                                                   |
| MMUD<br>(9/10,<br>HLA-A<br>MM) | Cy TBI                           | ATG/CYA /MTX            | - steroids (7)/ 2x<br>- Tac (6)<br>- alemtuzumab 2x<br>- rituximab 2x                             |
| MUD                            | Flu TBI                          | CYA /MMF                | - steroids (6)<br>- alemtuzumab 1x                                                                |
| sibling                        | Flu TBI                          | CYA /MMF                | - steroids (7)<br>- CYA (2)<br>- Tac (5)                                                          |
| MUD                            | BCNU/Etoposide/<br>ARA-C/Mel/Flu | ATG/CYA /MTX            | - steroids (48)<br>- ECP (26)                                                                     |
| sibling                        | Flu Mel                          | CYA /MMF                | - CYA (13)<br>- steroids (10)<br>- MMF (13)<br>- pentostatin (2 cycles)<br>- MSC (2)<br>- ECP (1) |
| MUD                            | Flu Bu                           | CYA<br>MMF              | - steroids (34)<br>- Tac (33)<br>- Eve (2)<br>- etanercept (9)                                    |
| MUD                            | Flu Mel                          | CYA<br>MMF              | - steroids (20)<br>- ATG (1)<br>- CYA (20)<br>- etanercept (6)                                    |
| sibling                        | Flu Mel                          | CYA , MTX               | - steroids (20)<br>- CYA                                                                          |
| sibling                        | FB                               | CYA , MTX               | - steroids (28)<br>- CYA (8)<br>- Eve (16)<br>- MMF (8)<br>- MSC (1)<br>- ECP (16)                |
| HLA-A mis<br>MMUD              | TBI<br>(12Gy)/Cy/ATG             | CYA , MMF               | - CYA , MMF (3)<br>- steroids (1)<br>- basiliximab (1)                                            |
| (HLA-A)                        | Flu Bu                           | CYA , MMF, ATG          | - CYA                                                                                             |

|           |                                                   |                                         |                                                                                                                                                                                  |
|-----------|---------------------------------------------------|-----------------------------------------|----------------------------------------------------------------------------------------------------------------------------------------------------------------------------------|
| MMUD      |                                                   |                                         | <ul style="list-style-type: none"> <li>- steroids</li> <li>- basiliximab</li> <li>- ATG</li> </ul>                                                                               |
| MMUD      | Bu Cy                                             | MMF, Tac, ATG                           | <ul style="list-style-type: none"> <li>- steroids</li> <li>- Tac</li> <li>- basiliximab</li> <li>- alemtuzumab (3 doses)</li> <li>- etanercept (7)</li> <li>- Eve (6)</li> </ul> |
| MUD 10/10 | FLAMSA-Mel,                                       | MMF, Tac, ATG                           | <ul style="list-style-type: none"> <li>- steroids</li> <li>- Tac</li> <li>- Etanercept (14)</li> <li>- alemtuzumab (3 doses)</li> <li>- ECP (5)</li> <li>- Sir</li> </ul>        |
| MUD 10/10 | ofatumumab<br>Flu Bu                              | MMF, Tac, ATG                           | <ul style="list-style-type: none"> <li>- steroids</li> <li>- Eve (5)</li> <li>- etanercept (5)</li> <li>- alemtuzumab (1)</li> </ul>                                             |
| MUD 10/10 | Cy-TBI                                            | MMF, Tac<br>Switch to MMF,<br>CYA , ATG | <ul style="list-style-type: none"> <li>- steroids (4)</li> <li>- etanercept (5)</li> <li>- basiliximab</li> <li>- alemtuzumab (twice, once afterwards)</li> </ul>                |
| MUD 10/10 | Cy-TBI                                            | MMF, Tac, ATG                           | <ul style="list-style-type: none"> <li>- steroids (4)</li> <li>- etanercept (5)</li> <li>- basiliximab</li> </ul>                                                                |
| URD       | TLI                                               | CYA , MMF, ATG                          | <ul style="list-style-type: none"> <li>- steroids (11)</li> <li>- budesonide (4)</li> <li>- etanercept (4)</li> </ul>                                                            |
| sibling   | BuFlu-ATG                                         | CYA , MMF                               | <ul style="list-style-type: none"> <li>- CYA (8)</li> <li>- steroids (8)</li> </ul>                                                                                              |
| MUD       | TBI (12Gy),<br>etoposide, Cy –<br>alemtuzumab     | CYA                                     | <ul style="list-style-type: none"> <li>- CYA (2)</li> <li>- steroids (2)</li> <li>- MMF (2)</li> </ul>                                                                           |
| MMUD      | FBM                                               | CYA , MMF                               | <ul style="list-style-type: none"> <li>- steroids</li> <li>- ECP</li> </ul>                                                                                                      |
| sibling   | Flu 30 mg/m2 day<br>-4 to -2 TBI (2 Gy)<br>day -1 | CYA , MMF                               | <ul style="list-style-type: none"> <li>- steroids</li> <li>- Tac</li> </ul>                                                                                                      |
| sibling   | Flu 30 mg/m2 day<br>-4 to -2 TBI (2 Gy)<br>day -1 | CYA , MMF                               | <ul style="list-style-type: none"> <li>- steroids</li> <li>- CYA</li> </ul>                                                                                                      |
| Haplo     | Flu/TT/Bu                                         | CYA , MMF,<br>post Tx Cy                | <ul style="list-style-type: none"> <li>- steroids (2)</li> </ul>                                                                                                                 |
| MUD       | Flu/Bu                                            | ATG, CYA , MTX                          | <ul style="list-style-type: none"> <li>- steroids (7)</li> </ul>                                                                                                                 |
| MUD       | Cy120/Bu16                                        | ATG, CYA /TAC,<br>MTX                   | <ul style="list-style-type: none"> <li>- steroids (2.5)</li> </ul>                                                                                                               |
| MUD       | ATG/ Flu/<br>Melphalan                            | CYA , MMF                               | <ul style="list-style-type: none"> <li>- Msc HOVON 112 (3)</li> <li>- Msc off protocol (3)</li> <li>- etanercept (8)</li> <li>- steroids (40)</li> </ul>                         |
| MUD       | Flu/Bu/ATG                                        | Sir/MMF                                 | <ul style="list-style-type: none"> <li>- steroids</li> <li>- Eve</li> <li>- alemtuzumab</li> <li>- MMF</li> </ul>                                                                |
| MMUD      | Flu/Bu/ATG                                        | CYA /MMF                                | <ul style="list-style-type: none"> <li>- steroids</li> <li>- CYA</li> </ul>                                                                                                      |

|  |  |  |       |
|--|--|--|-------|
|  |  |  | - MMF |
|--|--|--|-------|

IS = immunosuppression, sibling = sibling donor (matched related donor), MUD = matched unrelated donor, MMUD = mismatched unrelated donor, Haplo = Haploidentical donor, PB = peripheral blood stem cells, BM = Bone marrow, TLI = Total lymphoid irradiation, Bu = busulfan, Cy = cyclophosphamide, Flu = fludarabine, FBM = fludarabine/melphalan/BCNU, FLu / TT / Busulfan = fludarabine/thiotepa/busulfan, ATG = anti-thymocyte globuline, Thymo = thymoglobuline, TBI = total body irradiation, post Tx Cy = post-transplant cyclophosphamide, ECP = extracorporeal photophoresis, CYA = cyclosporine A, MMF = mycophenolate mofetil, MTX = methotrexate, Tac = tacrolimus, Sir = sirolimus, TBF = thiotepa, fludarabine, busulfan

**Suppl. Table 2: Chronic GvHD - Transplant characteristics**

| Donor   | Chemotherapy conditioning | IS as prophylaxis  | IS initiated as GvHD treatment prior to Ruxolitinib (duration in weeks)    |
|---------|---------------------------|--------------------|----------------------------------------------------------------------------|
| MMUD    | FBM                       | CYA<br>alemtuzumab | - steroids (144)<br>- CYA (144)<br>- ECP (19)                              |
| sibling | Flu/Treo                  | CYA<br>MMF         | - steroids (106)<br>- CYA (74)                                             |
| MUD     | FBM                       | CYA<br>alemtuzumab | - steroids (47)<br>- ECP (2)                                               |
| sibling | FBM                       | CYA<br>MTX         | - steroids (9)<br>- CYA (7)                                                |
| sibling | BuCy                      | CYA<br>MTX         | - steroids (28)<br>- ECP (25)<br>- cyclophosphamide (1)                    |
| sibling | BuCy                      | CYA<br>MTX         | - steroids (13)<br>- ECP (2)<br>- CYA (6)                                  |
| MUD     | FLAMSA/Treo               | CYA<br>MMF         | - steroids (163)<br>- MMF (133)<br>- Tac (129)<br>- ECP (125)<br>- MTX (4) |
| sibling | Flu/Bu                    | CYA /MTX           | - CYA (102)<br>- steroids (76)<br>- ECP (24)                               |
| MUD     | FluBu                     | Tac/MMF            | - Tac<br>- steroids<br>- rituximab<br>- MMF                                |
| MUD     | FluTreo                   | CYA/MMF            | - steroids<br>- MMF<br>- CYA                                               |
| Sibling | Flu/Treo                  | CYA , MMF          | - steroids (44)<br>- Sir (4)<br>- CYA (16)<br>- MMF (61)<br>- MTX (4)      |
| MMUD    | Flu/Mel                   | CYA /MMF           | - steroids (80)<br>- MTX (4)<br>- etanercept (4)                           |
| sibling | Flu/Treo                  | CYA /MMF           | - steroids (100)<br>- Sir (6)<br>- MTX (24)<br>- ECP                       |
| MUD     | Flu/Treo                  | CYA /MMF           | - steroids (110)<br>- Sir (6)<br>- MTX (3)<br>- etanercept (4)             |
| sibling | TBI (10Gy) Flu            | CYA , MTX          | - ECP                                                                      |

|                                  |                                            |                 |                                                                                                                                                                                                                                                                |
|----------------------------------|--------------------------------------------|-----------------|----------------------------------------------------------------------------------------------------------------------------------------------------------------------------------------------------------------------------------------------------------------|
|                                  |                                            |                 | <ul style="list-style-type: none"> <li>- steroids</li> <li>- Tac</li> <li>- MMF</li> <li>- beta-HCG</li> <li>- IL-2</li> <li>- budesonid</li> </ul>                                                                                                            |
| MUD                              | TBI (10Gy) Cy                              | CYA , MTX       | <ul style="list-style-type: none"> <li>- ECP</li> <li>- steroids</li> <li>- Eve</li> <li>- MMF</li> <li>- CYA</li> </ul>                                                                                                                                       |
| sibling                          | Treo/ Flu                                  | CYA , MTX       | <ul style="list-style-type: none"> <li>- steroids</li> <li>- MMF</li> <li>- Tac</li> </ul>                                                                                                                                                                     |
| MUD                              | FB-8                                       | CYA , MTX       | <ul style="list-style-type: none"> <li>- steroids (6 years low dose)</li> <li>- MTX (8)</li> <li>- CYA (32)</li> <li>- Tac (72)</li> <li>- MMF (32)</li> <li>- Eve (32)</li> <li>- MSC (4)</li> <li>- rituximab (4)</li> <li>- ECP (4 years on off)</li> </ul> |
| MUD                              | etoposide/12Gy TBI                         | CYA , MTX       | <ul style="list-style-type: none"> <li>- steroids (2 years)</li> <li>- CYA (12)</li> <li>- Tac (64)</li> <li>- MMF (48)</li> <li>- Sir (48)</li> <li>- ECP (28)</li> <li>- IL2 (16)</li> <li>- imatinib (4)</li> <li>- rituximab (4)</li> </ul>                |
| MUD                              | Flu/Mel                                    | CYA ,MTX        | <ul style="list-style-type: none"> <li>- steroids (48)</li> <li>- CYA (4)</li> <li>- Tac (48)</li> <li>- MSC (4)</li> <li>- ECP (48)</li> </ul>                                                                                                                |
| MUD                              | Flu/Mel                                    | CYA ,MTX        | <ul style="list-style-type: none"> <li>- steroids</li> <li>- CYA</li> <li>- Tac</li> <li>- ECP</li> </ul>                                                                                                                                                      |
| MUD                              | ATG, Bu, Flu                               | CYA , MMF, Ig-s | <ul style="list-style-type: none"> <li>- Tac (14)</li> <li>- steroids (6)</li> <li>- ECP(6)</li> </ul>                                                                                                                                                         |
| MMUD                             | Ara-C, BCNU, Flu, ATG, etoposide, Mel, TBI | CYA , MMF, Ig-s | <ul style="list-style-type: none"> <li>- CYA (35)</li> <li>- steroids (35)</li> </ul>                                                                                                                                                                          |
| Sibling (2003)<br>Sibling (2012) | Flu/Treo                                   | CYA , MMF, Ig-s | <ul style="list-style-type: none"> <li>- CYA (22)</li> <li>- steroids (15.5)</li> </ul>                                                                                                                                                                        |
| MUD (2009)<br>MUD (2014)         | ATG, Bu, Flu                               | CYA , MMF, Ig-s | <ul style="list-style-type: none"> <li>- CYA (180)</li> <li>- ECP (27)</li> <li>- steroids (48)</li> </ul>                                                                                                                                                     |
| MUD                              | FLAMSA-Treo                                | MMF, Tac        | <ul style="list-style-type: none"> <li>- steroids (141)</li> <li>- Tac (141)</li> </ul>                                                                                                                                                                        |
| sibling                          | Flu, Treo                                  | MMF,CYA         | <ul style="list-style-type: none"> <li>- steroids (126)</li> <li>- Sir(48)</li> <li>- Eve (78)</li> <li>- ECP (30)</li> <li>- PUVA (3)</li> </ul>                                                                                                              |
| sibling                          | 12Gy TBI, Cy                               | CYA , MTX       | <ul style="list-style-type: none"> <li>- steroids (330)</li> <li>- MMF (309)</li> <li>- UVA (11)</li> <li>- ECP (36)</li> <li>- imatinib (214)</li> <li>- thalidomide (2)</li> </ul>                                                                           |



|         |                             |                             |                                                                                 |
|---------|-----------------------------|-----------------------------|---------------------------------------------------------------------------------|
| MUD     | 8Gy TBI, Flu                | CYA , MTX                   | - steroids (33)<br>- MMF (31)<br>- ECP (8)<br>- CYA (4)                         |
| sibling | Flu, BCNU, Mel              | CYA , MTX                   | - FK506 (19)<br>- steroids (19)                                                 |
| Haplo   | 8Gy TBI, Flu, ATG           |                             | - steroids (65)<br>- MMF (61)<br>- ECP (56)                                     |
| sibling | 8Gy TBI, Flu, ATG           | CYA , MTX                   | - MMF (70)<br>- steroids (55)<br>- ECP (28)                                     |
| sibling | 4Gy TBI, Flu, Cy            | CYA , MMF                   | - MMF (154)<br>- steroids (53)<br>- UVA (4)                                     |
| sibling | Flu, BCNU, Mel              | CYA , MTX                   | - MMF (17)<br>- steroids (26)<br>- UVA (3)                                      |
| MUD     | Flu, Bu                     | CYA , MTX                   | - steroids (308)<br>- MMF (303)<br>- ECP (9)                                    |
| MMUD    | Flu, BCNU, Mel              | CYA , MMF                   | - CYA /Tac (18)<br>- steroids (18)<br>- MMF (10)<br>- ECP (9)                   |
| MUD     | Flu, BCNU, Mel +<br>4Gy TBI | CYA , MTX                   | - steroids (7)<br>- MMF (2)<br>- UVA (0,3)                                      |
| sibling | Flu/TBI, 2Gy<br>ATG/Flu/Mel | CYA, MMF                    | - nilotinib<br>- steroids                                                       |
| MMUD    | Flu/Bu/ATG                  | CYA, MMF                    | - CYA<br>- MMF<br>- steroids<br>- Eve<br>- MTX<br>- rituximab<br>- ECP          |
| sibling | Flu/Mel                     | CYA , Sir,<br>MMF, steroids | - CYA<br>- MMF<br>- steroids<br>- Sir<br>- Eve<br>- MTX<br>- rituximab<br>- ECP |
| sibling | TBI/etoposide               | CYA , MTX                   | - CYA<br>- MTX<br>- steroids<br>- Eve<br>- ECP                                  |

IS = immunosuppression, sibling = sibling donor (matched related donor), MUD = matched unrelated donor, MMUD = mismatched unrelated donor, Haplo = haploidentical donor, MMF: mycophenolate mofetil, MTX = methotrexate, CYA = Cyclosporine A, Flu = fludarabine, Tac = tacrolimus, Eve = everolimus, Sir = sirolimus, ECP = extracorporeal photopheresis, TBI = total body irradiation, Treo = treosulfan, Mel = melphalan, Eto = etoposide, Bu = busulfan MSC = mesenchymal strom cells, Ig-s = immunoglobulins, FBM = fludarabine/melphalan/BCNU
